# Supplementary material for: Evaluation of the Performance of an Indirect Immunofluorescence Assay for the Detection of Anti-MDA5 Antibodies
Source: MDPI journal article supplement (doi:10.3390/biomedicines10112969), 2022-11-18
Supplement: s1 [file s1]

## Supplementary materials

**Table S1 :** Results of immunodot assay, ELISA and indirect immunofluorescence on MDA5 transfected cells and HEp-2 cells for the 23 patients with anti-MDA5 positive dermatomyositis

| Patient ID           | Immunodot | Immunodot intensity | ELISA (U/mL) | IIF on MDA5 transfected cells (inverse dilution) | IIF pattern on HEp-2 cells |
|----------------------|-----------|---------------------|--------------|--------------------------------------------------|----------------------------|
| MDA5 <sup>+</sup> 1  | positive  | 85                  | 108          | 1350                                             | MDA5 pattern               |
| MDA5 <sup>+</sup> 2  | positive  | 56                  | 138          | 1350                                             | MDA5 pattern               |
| MDA5 <sup>+</sup> 3  | Hpo       | 103                 | 94           | 1350                                             | Non-specific               |
| MDA5 <sup>+</sup> 4  | Hpo       | 114                 | 143          | 12150                                            | MDA5 pattern               |
| MDA5 <sup>+</sup> 5  | positive  | 85                  | 119          | 4050                                             | MDA5 pattern               |
| MDA5 <sup>+</sup> 6  | Hpo       | 103                 | 105          | 1350                                             | MDA5 pattern               |
| MDA5 <sup>+</sup> 7  | Hpo       | 112                 | 181          | 4050                                             | MDA5 pattern               |
| MDA5 <sup>+</sup> 8  | Hpo       | 179                 | 153          | 12150                                            | MDA5 pattern               |
| MDA5 <sup>+</sup> 9  | positive  | 46                  | 91           | 4050                                             | MDA5 pattern               |
| MDA5 <sup>+</sup> 10 | positive  | 44                  | 159          | 12150                                            | MDA5 pattern               |
| MDA5 <sup>+</sup> 11 | positive  | 31                  | 100          | 4050                                             | MDA5 pattern               |
| MDA5 <sup>+</sup> 12 | Hpo       | 175                 | 142          | 12150                                            | MDA5 pattern               |
| MDA5 <sup>+</sup> 13 | Hpo       | 140                 | 147          | 12150                                            | MDA5 pattern               |
| MDA5 <sup>+</sup> 14 | positive  | 39                  | 109          | 1350                                             | MDA5 pattern               |
| MDA5 <sup>+</sup> 15 | positive  | 76                  | 135          | 1350                                             | MDA5 pattern               |
| MDA5 <sup>+</sup> 16 | positive  | 38                  | 155          | 4050                                             | Non-specific               |
| MDA5 <sup>+</sup> 17 | positive  | 60                  | 120          | 12150                                            | MDA5 pattern               |
| MDA5 <sup>+</sup> 18 | Hpo       | 136                 | 161          | 12150                                            | MDA5 pattern               |
| MDA5 <sup>+</sup> 19 | positive  | 42                  | 154          | 12150                                            | Non-specific               |
| MDA5 <sup>+</sup> 20 | Hpo       | 127                 | 140          | 12150                                            | MDA5 pattern               |
| MDA5 <sup>+</sup> 21 | positive  | 72                  | 98           | 450                                              | MDA5 pattern               |
| MDA5 <sup>+</sup> 22 | positive  | 81                  | 143          | 4050                                             | Non-specific               |
| MDA5 <sup>+</sup> 23 | positive  | 74                  | 66           | 0                                                | MDA5 pattern               |

The IIF pattern on HEp-2 cells was termed "MDA5 pattern" when the characteristic cytoplasmic staining in rare clustered cells was observed. Otherwise, it was termed "Non-specific".

Abbreviations: Hpo: high positive, IIF: indirect immunofluorescence.

**Table S2 :** Clinical features of the three clinical subgroups made depending on the frequency of RP-ILD, cutaneous manifestations, ulcerations, Raynaud phenomenon and arthritis

|                                             | <b>Group 1 (n=11)</b> | <b>Group 2 (n=3)</b> | <b>Group 3 (n=9)</b> |
|---------------------------------------------|-----------------------|----------------------|----------------------|
| <b>Mean age <math>\pm</math> SD (years)</b> | 61 $\pm$ 13           | 50 $\pm$ 13          | 46 $\pm$ 15          |
| <b>Women</b>                                | 6/11 (55%)            | 2/3 (67%)            | 5/9 (56%)            |
| <b>Clinical manifestations</b>              |                       |                      |                      |
| <b>RP-ILD</b>                               | 11/11 (100%)          | 0 (0)                | 0 (0)                |
| <b>Cutaneous manifestations</b>             | 9/11 (82%)            | 3/3 (100%)           | 9/9 (100%)           |
| <b>Ulcerations</b>                          | 4/11 (36%)            | 3/3 (100%)           | 0 (0)                |
| <b>Arthritis</b>                            | 6/11 (55%)            | 3/3 (100%)           | 8/9 (89%)            |
| <b>Raynaud phenomenon</b>                   | 2/11 (18%)            | 3/3 (100%)           | 0 (0)                |
| <b>Muscular damage</b>                      | 6/11 (55%)            | 3/3 (100%)           | 6/9 (67%)            |
| <b>Mortality rate</b>                       | 6/11 (55%)            | 0 (0)                | 1/9 (11%)            |

Abbreviations: RP-ILD: rapidly progressive interstitial lung disease
